# Supplementary material for: Structural diversity of 5-methylnicotinate coordination assemblies regulated by metal-ligating tendency and metal-dependent anion effect
Source: Royal Society of Chemistry journal article supplement (doi:10.1039/c4ce00187g), 2014-01-01
Supplement: c4ce00187g1.pdf [file c4ce00187g1.pdf]

*Electronic Supplementary Information (ESI)*

**Structural diversity of 5-methylnicotinate coordination assemblies  
regulated by metal-ligating tendency and metal-dependent anion effect**

Cheng-Peng Li, Jing Chen, Peng-Wen Liu, and Miao Du\*

*College of Chemistry, Tianjin Key Laboratory of Structure and Performance for Functional Molecules,*

*MOE Key Laboratory of Inorganic-Organic Hybrid Functional Material Chemistry, Tianjin Normal*

*University, Tianjin 300387, P. R. China.*

\* To whom correspondence should be addressed. E-mail: dumiao@public.tpt.tj.cn.

***CrystEngComm***

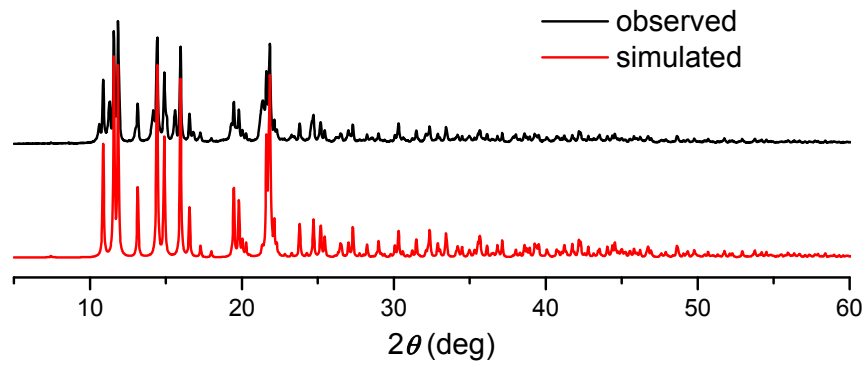

(a)

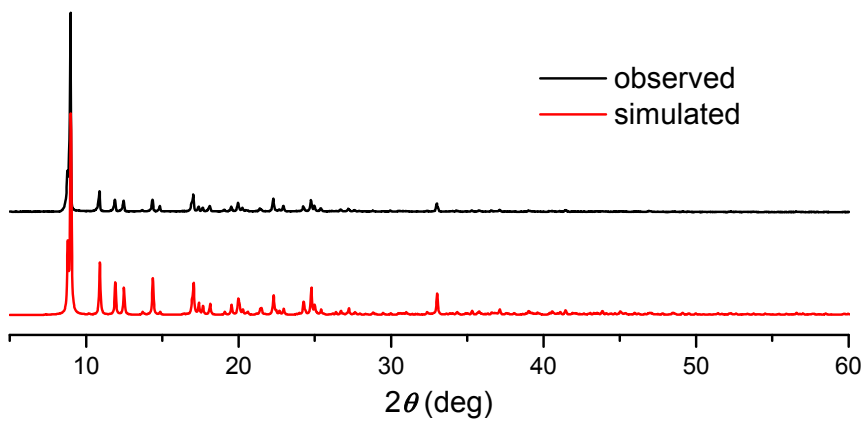

(b)

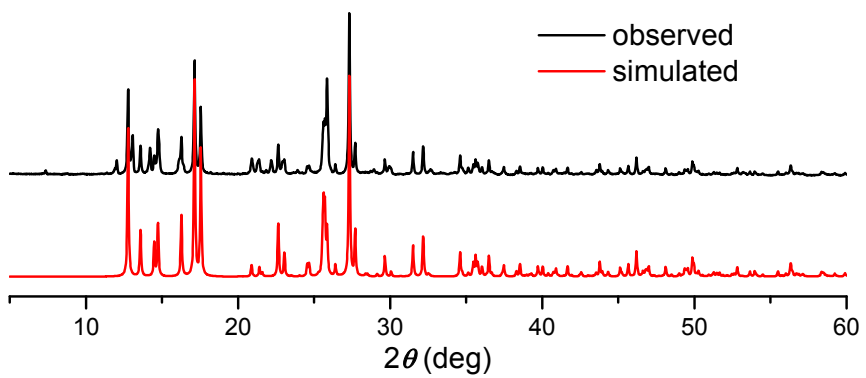

(c)

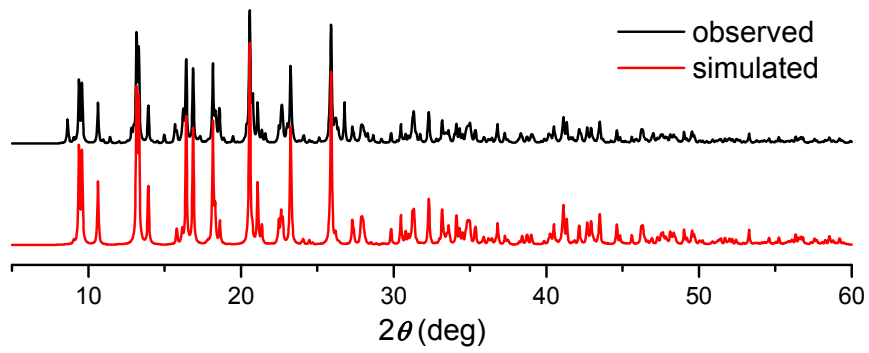

(d)

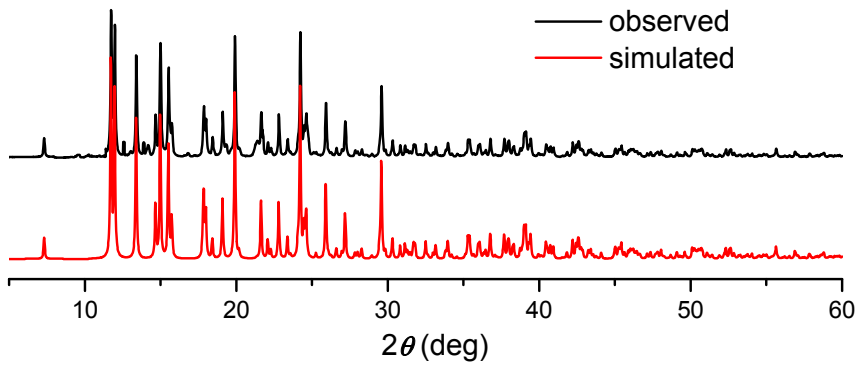

(e)

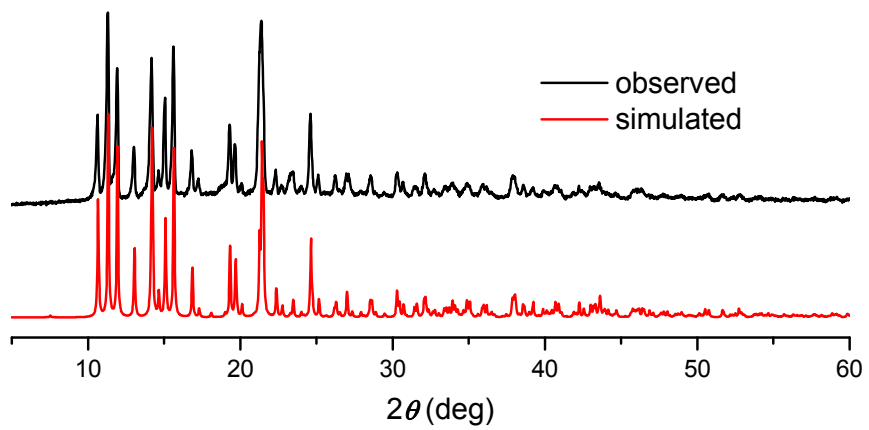

(f)

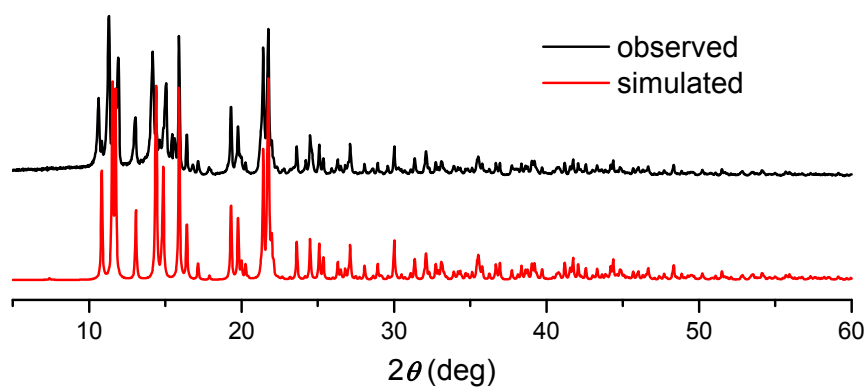

(g)

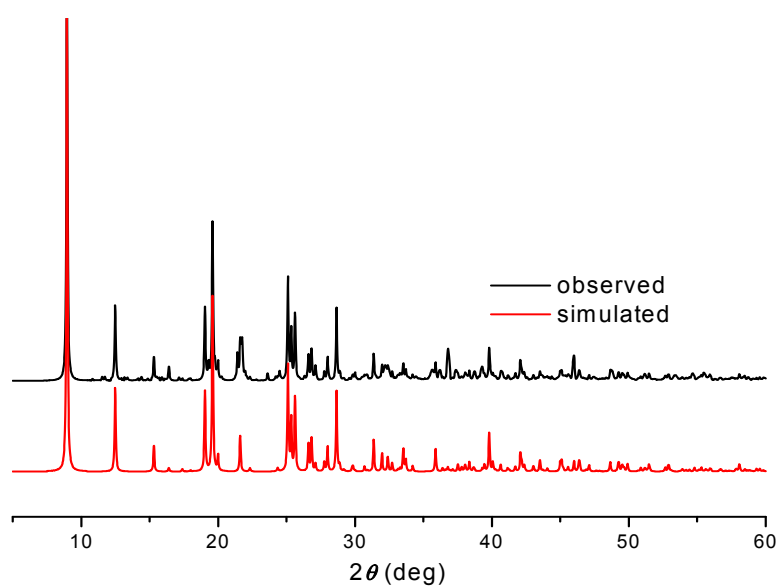

(h)

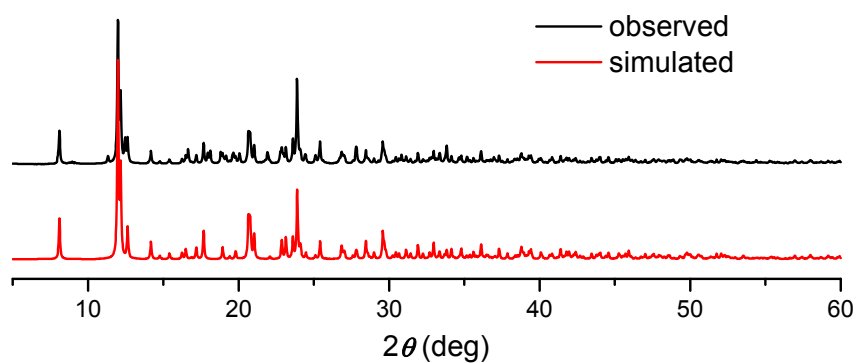

(i)

**Fig. S1** Powder X-ray diffraction (PXRD) patterns for complexes **1–9** (a–i).

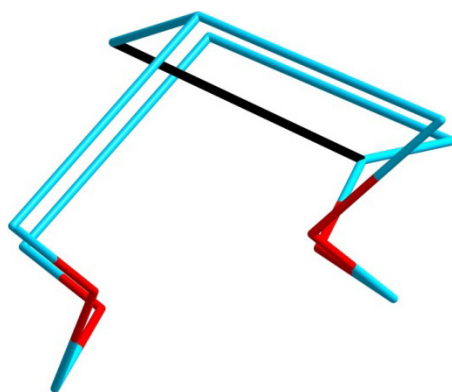

**Fig. S2** View of the self-interpenetrating pattern in **2**.

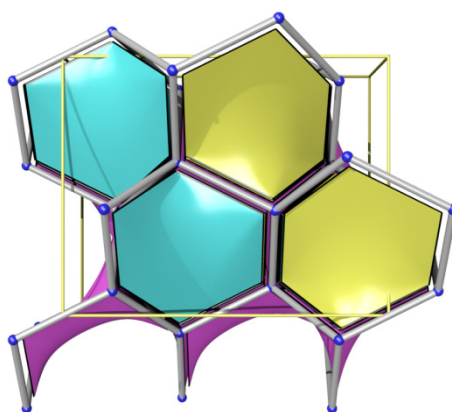

**Fig. S3** Topological view of the **noz** network for **2** with  $[\text{Ni}_2(\text{H}_2\text{O})(\text{COO})_2]$  units as the nodes.

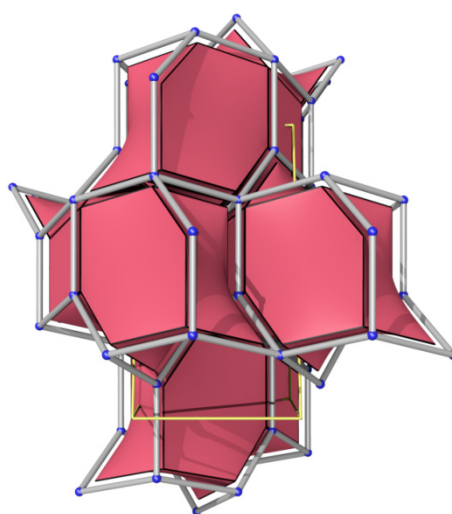

**Fig. S4** Topological view the (3,5)-connected  $(4.6^2)(4.6^7.8^2)$  network for **9**.

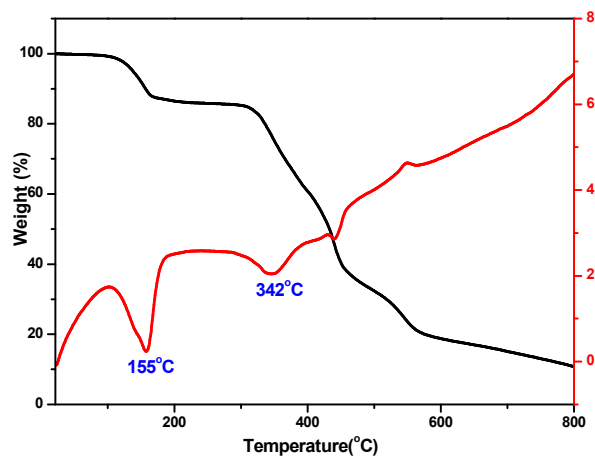

(a)

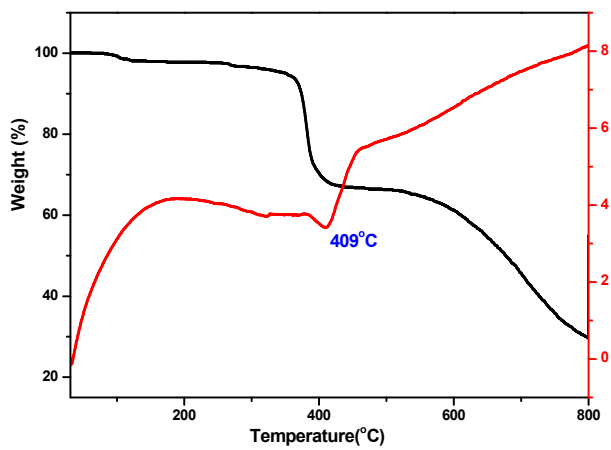

(b)

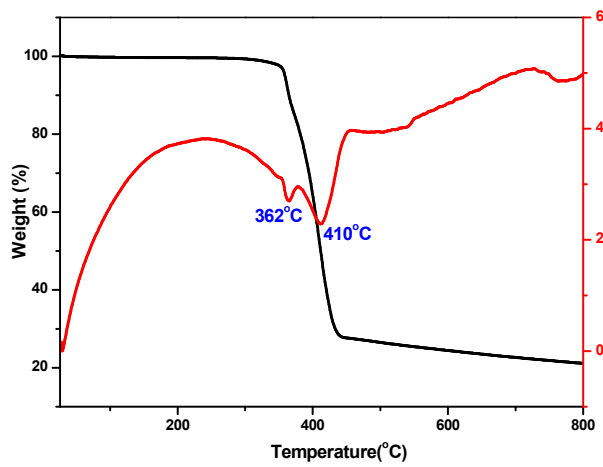

(c)

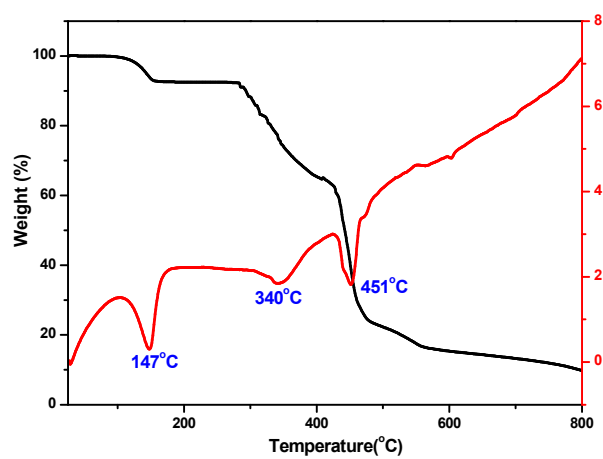

(d)

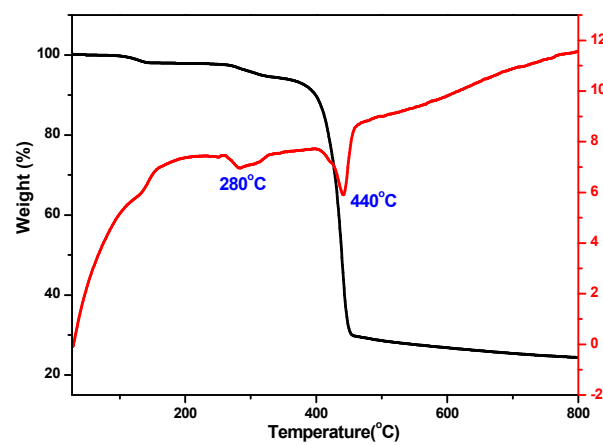

(e)

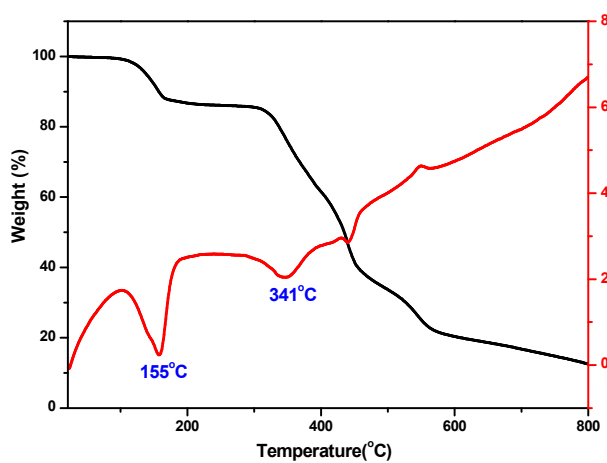

(f)

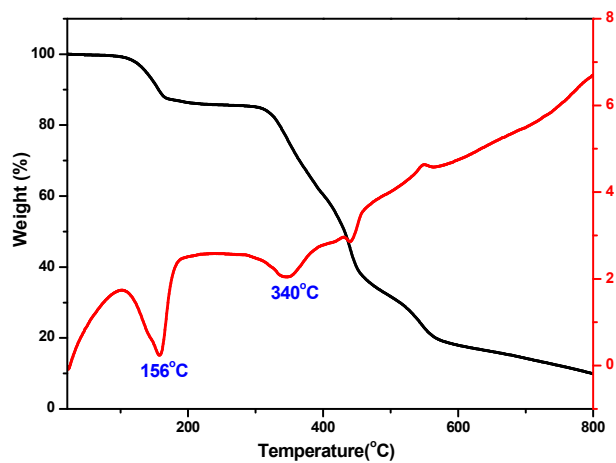

(g)

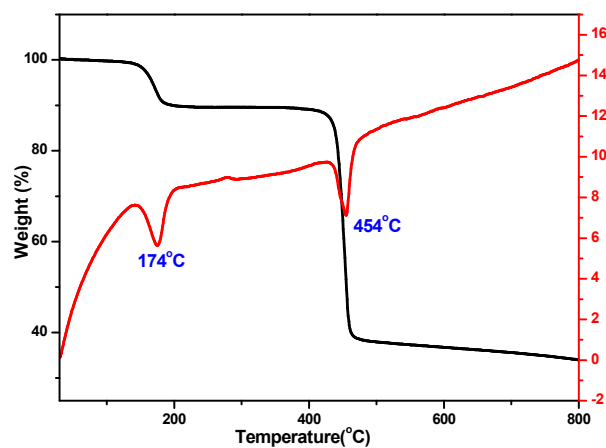

(h)

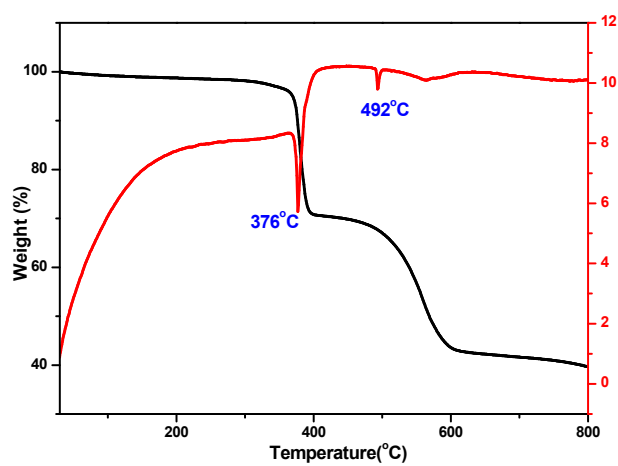

(i)

Fig. S4 TG-DTA curves for complexes 1-9.



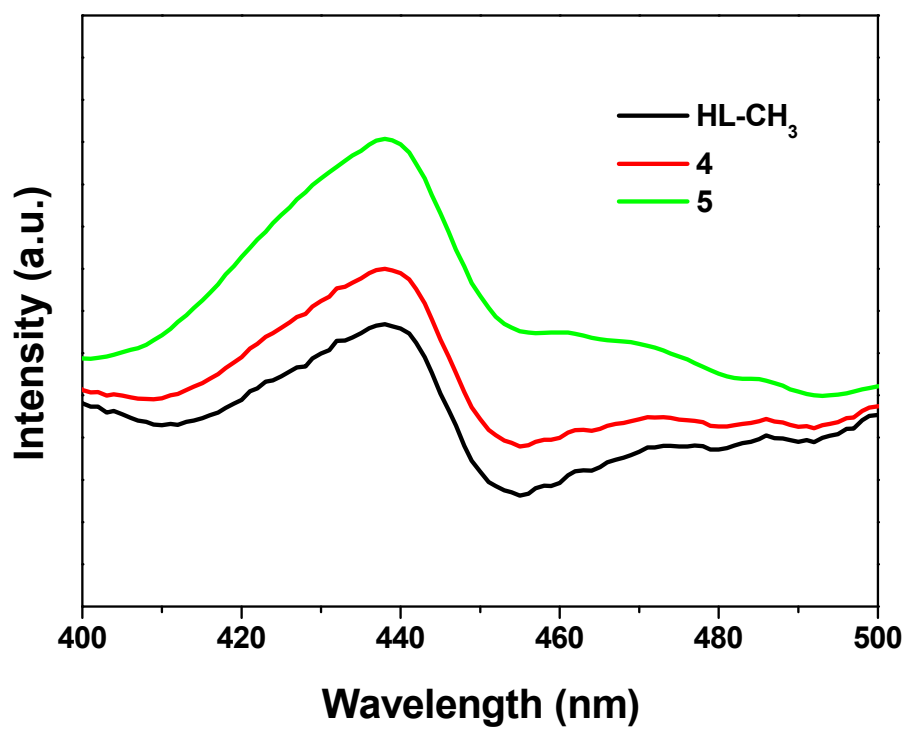

**Fig. S6** Solid-state emission spectra for HL-CH<sub>3</sub> ligand and complexes 4 and 5.

**Table S1** Selective bond lengths (Å) and angles (°) for complexes **1–9**

---

| <b>1</b>    |            |            |            |
|-------------|------------|------------|------------|
| Ni1–O4      | 2.0343(13) | Ni1–O5     | 2.0787(14) |
| Ni1–N1      | 2.1101(17) | Ni2–O1A    | 2.0126(13) |
| Ni2–N2      | 2.0852(16) | Ni2–O6     | 2.1035(14) |
|             |            |            |            |
| O4–Ni1–O5   | 91.10(6)   | O4–Ni1–N1  | 89.19(6)   |
| O5–Ni1–N1   | 90.49(6)   | O1A–Ni2–N2 | 90.04(6)   |
| O1A–Ni2–O6  | 92.03(6)   | N2–Ni2–O6  | 88.64(6)   |
|             |            |            |            |
| <b>2</b>    |            |            |            |
| Ni1–O3A     | 2.047(2)   | Ni1–N2     | 2.087(2)   |
| Ni1–O8      | 2.088(2)   | Ni1–N1     | 2.100(3)   |
| Ni1–O6B     | 2.113(2)   | Ni1–O9     | 2.134(2)   |
| Ni2–O4A     | 2.055(2)   | Ni2–O7     | 2.067(2)   |
| Ni2–N4      | 2.096(3)   | Ni2–N3A    | 2.097(3)   |
| Ni2–O9      | 2.103(2)   | Ni2–O2C    | 2.114(2)   |
|             |            |            |            |
| O3A–Ni1–N2  | 93.76(9)   | O3A–Ni1–O8 | 97.30(8)   |
| N2–Ni1–O8   | 84.31(9)   | O3A–Ni1–N1 | 90.55(9)   |
| N2–Ni1–N1   | 89.75(10)  | O8–Ni1–N1  | 170.43(9)  |
| O3A–Ni1–O6B | 174.84(9)  | N2–Ni1–O6B | 91.39(9)   |
| O8–Ni1–O6B  | 82.92(9)   | N1–Ni1–O6B | 89.75(9)   |
| O3A–Ni1–O9  | 86.15(8)   | N2–Ni1–O9  | 175.28(9)  |
| O8–Ni1–O9   | 91.02(8)   | N1–Ni1–O9  | 94.97(9)   |
| O6B–Ni1–O9  | 88.69(8)   | O4A–Ni2–O7 | 96.39(8)   |
| O4A–Ni2–N4  | 173.83(9)  | O7–Ni2–N4  | 89.25(9)   |
| O4A–Ni2–N3A | 85.62(9)   | O7–Ni2–N3A | 92.51(9)   |
| N4–Ni2–N3A  | 91.66(10)  | O4A–Ni2–O9 | 89.11(8)   |

|             |           |             |          |
|-------------|-----------|-------------|----------|
| O7–Ni2–O9   | 88.59(8)  | N4–Ni2–O9   | 93.53(9) |
| N3A–Ni2–O9  | 174.71(9) | O4A–Ni2–O2C | 83.15(8) |
| O7–Ni2–O2C  | 177.75(8) | N4–Ni2–O2C  | 91.30(9) |
| N3A–Ni2–O2C | 89.65(9)  | O9–Ni2–O2C  | 89.20(8) |

### 3

|              |            |              |           |
|--------------|------------|--------------|-----------|
| Ni1–O1       | 1.9724(18) | Ni1–Cl1      | 2.2326(8) |
| Ni1–O1A      | 1.9724(18) | Ni1–Cl1A     | 2.2326(8) |
| O1–Ni1–O1A   | 88.62(11)  | O1–Ni1–Cl1A  | 116.47(7) |
| O1A–Ni1–Cl1A | 112.38(6)  | O1–Ni1–Cl1   | 112.38(6) |
| O1A–Ni1–Cl1  | 116.47(7)  | Cl1A–Ni1–Cl1 | 109.46(5) |

### 4

|             |          |            |            |
|-------------|----------|------------|------------|
| Cd1–O8      | 2.276(7) | Cd1–O5     | 2.282(6)   |
| Cd1–O6      | 2.298(6) | Cd1–N2     | 2.308(8)   |
| Cd1–N1      | 2.309(8) | Cd1–O7     | 2.316(6)   |
| Cd2–O11     | 2.230(7) | Cd2–O9     | 2.251(6)   |
| Cd2–O10     | 2.268(7) | Cd2–O4A    | 2.275(6)   |
| Cd2–O2      | 2.275(6) | Cd2–O1     | 2.671(1)   |
| Cd2–O3A     | 2.655(1) |            |            |
| O8–Cd1–O5   | 90.8(2)  | O8–Cd1–O6  | 175.92(19) |
| O5–Cd1–O6   | 90.5(2)  | O8–Cd1–N2  | 87.3(2)    |
| O5–Cd1–N2   | 92.3(2)  | O6–Cd1–N2  | 88.7(2)    |
| O8–Cd1–N1   | 92.5(2)  | O5–Cd1–N1  | 87.8(2)    |
| O6–Cd1–N1   | 91.5(2)  | N2–Cd1–N1  | 179.78(19) |
| O8–Cd1–O7   | 89.2(2)  | O5–Cd1–O7  | 176.4(2)   |
| O6–Cd1–O7   | 89.8(2)  | N2–Cd1–O7  | 91.3(2)    |
| N1–Cd1–O7   | 88.6(2)  | O11–Cd2–O9 | 87.3(2)    |
| O11–Cd2–O10 | 173.7(3) | O9–Cd2–O10 | 87.4(2)    |

|             |          |             |          |
|-------------|----------|-------------|----------|
| O11–Cd2–O4A | 98.9(3)  | O9–Cd2–O4A  | 135.5(2) |
| O10–Cd2–O4A | 87.3(3)  | O11–Cd2–O2  | 90.8(3)  |
| O9–Cd2–O2   | 136.8(2) | O10–Cd2–O2  | 90.7(3)  |
| O4A–Cd2–O2  | 87.4(3)  | O3A–Cd2–O11 | 95.8(3)  |
| O3A–Cd2–O9  | 83.5(2)  | O3A–Cd2–O10 | 87.0(3)  |
| O3A–Cd2–O4A | 52.1(2)  | O3A–Cd2–O2  | 139.5(2) |
| O3A–Cd2–O1  | 168.3(2) | O1–Cd2–O11  | 85.2(3)  |
| O1–Cd2–O9   | 84.9(2)  | O1–Cd2–O10  | 90.9(3)  |
| O1–Cd2–O4A  | 139.3(2) | O1–Cd2–O2   | 51.9(2)  |

## 5

|             |           |            |           |
|-------------|-----------|------------|-----------|
| Cd1–O1      | 2.237(2)  | Cd1–N2A    | 2.311(2)  |
| Cd1–O5      | 2.320(2)  | Cd1–N1B    | 2.343(3)  |
| Cd1–O3      | 2.368(2)  | Cd1–O4     | 2.417(2)  |
| O1–Cd1–N2A  | 97.76(9)  | O1–Cd1–O5  | 81.92(8)  |
| N2A–Cd1–O5  | 93.71(8)  | O1–Cd1–N1B | 87.76(8)  |
| N2A–Cd1–N1B | 93.69(9)  | O5–Cd1–N1B | 168.02(8) |
| O1–Cd1–O3   | 115.68(9) | N2A–Cd1–O3 | 146.53(8) |
| O5–Cd1–O3   | 89.94(8)  | N1B–Cd1–O3 | 89.08(8)  |
| O1–Cd1–O4   | 163.90(8) | N2A–Cd1–O4 | 92.37(8)  |
| O5–Cd1–O4   | 84.99(8)  | N1B–Cd1–O4 | 104.10(8) |
| O3–Cd1–O4   | 54.80(7)  |            |           |

## 6

|           |            |           |           |
|-----------|------------|-----------|-----------|
| Cu1–O1    | 1.9641(19) | Cu1–N2    | 2.036(2)  |
| Cu1–O5    | 2.395(3)   | Cu2–O3    | 1.963(2)  |
| Cu2–N1A   | 2.023(2)   | Cu2–O6    | 2.400(2)  |
| O1–Cu1–N2 | 89.78(9)   | N2–Cu1–O5 | 91.80(10) |

|            |          |            |          |
|------------|----------|------------|----------|
| O1-Cu1-O5  | 92.39(9) | O3-Cu2-O6  | 95.21(8) |
| O3-Cu2-N1A | 90.35(9) | N1A-Cu2-O6 | 88.80(9) |

7

|        |            |         |            |
|--------|------------|---------|------------|
| Co1-O3 | 2.0556(12) | Co1-O5  | 2.1188(13) |
| Co1-N1 | 2.1666(15) | Co2-O1A | 2.0276(12) |
| Co2-N2 | 2.1397(15) | Co2-O6  | 2.1444(12) |

|            |          |            |          |
|------------|----------|------------|----------|
| O3-Co1-O5  | 90.22(5) | O3-Co1-N1  | 89.15(5) |
| O5-Co1-N1  | 89.58(6) | N2-Co2-O6  | 88.61(5) |
| O1A-Co2-O6 | 88.93(5) | O1A-Co2-N2 | 90.11(6) |

8

|         |            |        |            |
|---------|------------|--------|------------|
| Mn1-O2A | 2.1669(11) | Mn1-O3 | 2.1963(11) |
| Mn1-N1  | 2.2762(13) |        |            |

|            |          |            |          |
|------------|----------|------------|----------|
| O2A-Mn1-O3 | 88.57(4) | O2A-Mn1-N1 | 91.49(4) |
| O3-Mn1-N1  | 85.39(5) |            |          |

9

|            |            |            |           |
|------------|------------|------------|-----------|
| Pb1-O2     | 2.375(4)   | Pb1-O3     | 2.423(4)  |
| Pb1-N2     | 2.587(5)   | Pb1-O1     | 2.710(6)  |
| Pb1-N1A    | 2.734(6)   | Pb1-O4     | 2.850(5)  |
| Pb1-O4B    | 2.782(6)   |            |           |
| O2-Pb1-O3  | 88.34(15)  | O2-Pb1-N2  | 81.43(18) |
| O3-Pb1-N2  | 90.15(17)  | O2-Pb1-O1  | 51.37(15) |
| O3-Pb1-O1  | 139.70(14) | N2-Pb1-O1  | 83.50(17) |
| O2-Pb1-N1A | 81.98(18)  | O3-Pb1-N1A | 79.09(17) |
| N2-Pb1-N1A | 160.45(19) | O1-Pb1-N1A | 94.13(18) |
| O4-Pb1-O2  | 132.04(18) | O4-Pb1-O3  | 48.53(15) |

|             |            |            |            |
|-------------|------------|------------|------------|
| O4-Pb1-N2   | 79.24(19)  | O4-Pb1-O1  | 161.13(18) |
| O4-Pb1-N1A  | 104.69(22) | O4-Pb1-O4B | 82.70(21)  |
| O4B-Pb1-O2  | 131.89(19) | O4B-Pb1-O3 | 130.94(18) |
| O4B-Pb1-N2  | 73.33(22)  | O4B-Pb1-O1 | 85.08(18)  |
| O4B-Pb1-N1A | 125.93(25) |            |            |

Symmetry codes:  $A = x + 1/2, -y + 3/2, z + 1/2$  for **1**;  $A = -x + 1/2, y - 1/2, z$ ;  $B = -x + 1, -y + 2, -z + 1$ ;  $C = -x + 1, y - 1/2, -z + 1/2$  for **2**;  $A = -x + 1, y, -z + 3/2$  for **3**;  $A = x - 1, -y + 1/2, z - 1/2$  for **4**;  $A = x, y - 1, z$ ;  $B = -x + 2, -y, -z + 1$  for **5**;  $A = -x + 2, y, -z + 1/2$  for **6**;  $A = x - 1/2, -y + 1/2, z - 1/2$  for **7**;  $A = x, -y + 3/2, z - 1/2$  for **8**;  $A = -x + 1, y - 1/2, -z + 3/2$ ;  $B = -x, -y + 1, -z + 1$  for **9**.

---
